# Supplementary material for: Architecture transition of supramolecular polymers through hierarchical self-assembly: from supramolecular polymers to fluorescent materials
Source: Royal Society of Chemistry journal article supplement (doi:10.1039/d0py00829j), 2020-01-01
Supplement: d0py00829j1.pdf [file d0py00829j1.pdf]

# Architecture transition of supramolecular polymer through hierarchical self-assembly: from supramolecular polymer to fluorescence material

Riqiang Li, <sup>#a</sup> Wenzhuo Chen, <sup>#b</sup> Ying Yang, <sup>a</sup> Hui Li, <sup>\*a</sup> Fenfen Xu, <sup>a</sup> Zhaozhao Duan, <sup>a</sup> Tongxiang Liang, <sup>\*a</sup> Herui Wen, <sup>a</sup> and Wei Tian <sup>\*b</sup>

<sup>a</sup> School of Materials Science and Engineering, Jiangxi University of Science and Technology, Ganzhou 341000, P. R. China.

<sup>b</sup> MOE Key Laboratory of Material Physics and Chemistry under Extraordinary Conditions and Shaanxi Key Laboratory of Macromolecular Science and Technology, School of Science, Northwestern Polytechnical University, Xi' an 710072, P. R. China.

\* E-mail: lh@jxust.edu.cn (H. L.)

\* E-mail: liang\_tx@126.com (T. X. L.)

\* E-mail: happytw\_3000@nwpu.edu.cn (W. T)

## Supporting information

|                                                                                                  |   |
|--------------------------------------------------------------------------------------------------|---|
| 1. 2D <sup>1</sup> H- <sup>1</sup> H COSY NMR spectra.....                                       | 2 |
| 2. Concentration-dependent <sup>1</sup> H NMR spectra.....                                       | 3 |
| 3. 2D NOESY NMR spectra.....                                                                     | 4 |
| 4. 2D DOSY NMR spectra.....                                                                      | 5 |
| 5. TEM photograph.....                                                                           | 6 |
| 6. Disassembly and reassembly of supramolecular polymers by adding-removing K <sup>+</sup> ..... | 7 |
| 7. Disassembly of SCP1 by adding adiponitrile.....                                               | 8 |
| 8. Fluorescence titrations.....                                                                  | 8 |

1. 2D  $^1\text{H}$ - $^1\text{H}$  COSY NMR spectra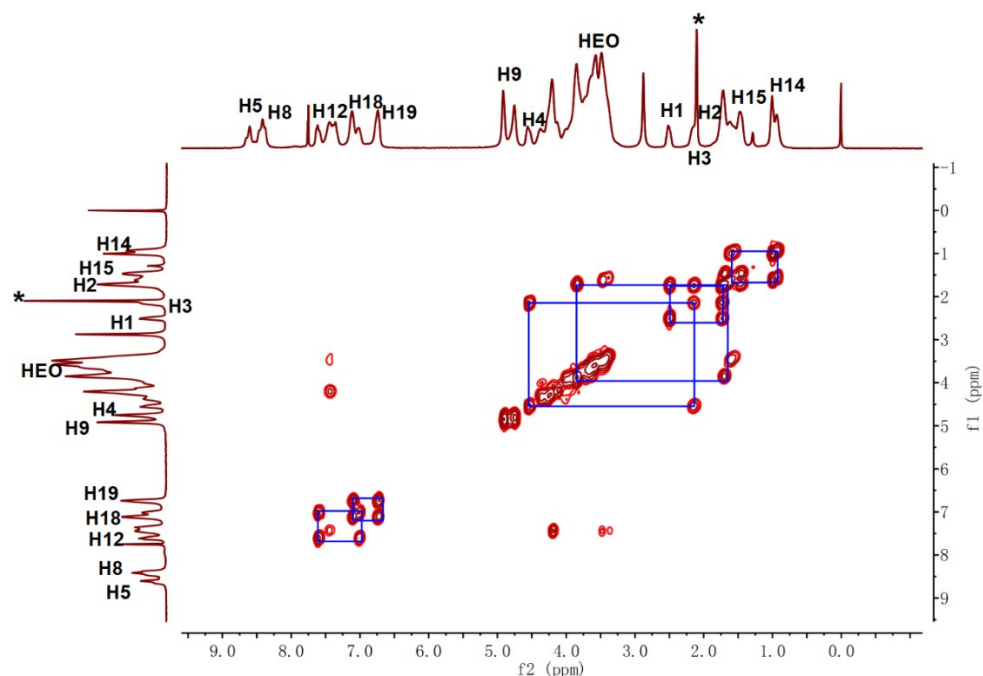

**Fig. S1**  $^1\text{H}$ - $^1\text{H}$  COSY NMR spectrum (400 MHz,  $\text{CDCl}_3$ - $\text{CD}_3\text{COCD}_3 = 2/1$ , v/v, 298 K, 20mM) of AB2+C2. The strong correlations between the protons  $\text{H}_1$  and  $\text{H}_2$  and between  $\text{H}_3$  and  $\text{H}_4$  on AB2 were observed, the correlation between  $\text{H}_{14}$  and  $\text{H}_{15}$  and between  $\text{H}_{18}$  and  $\text{H}_{19}$  on C2 were also observed at the same time. By means of the  $^1\text{H}$ - $^1\text{H}$  COSY experiment, the complexed  $^1\text{H}$ NMR spectrum of AB2+C2 was accurately identified.

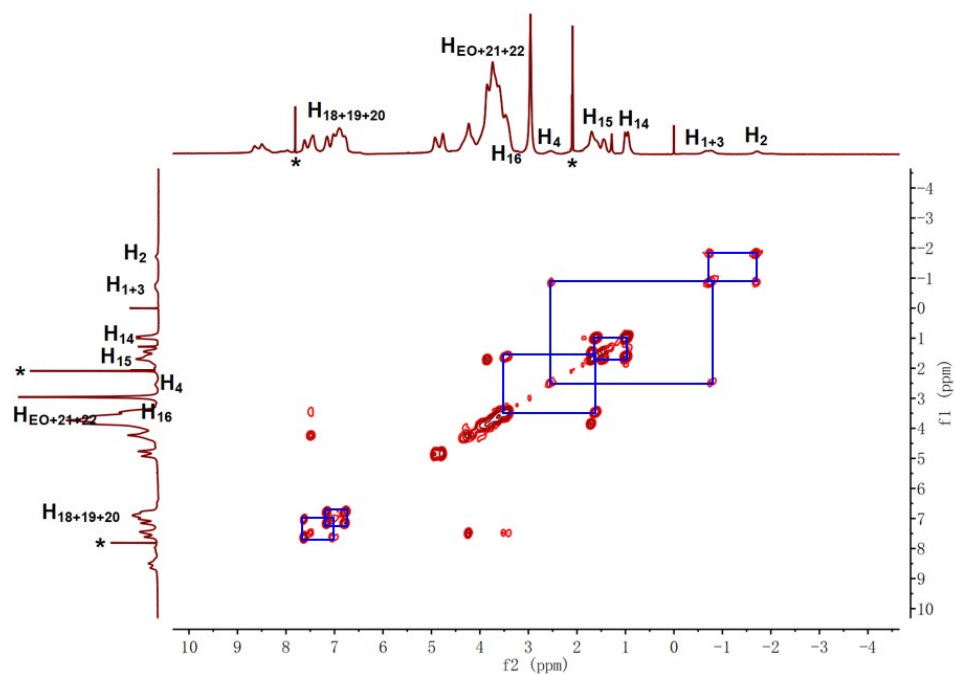

**Fig. S2**  $^1\text{H}$ - $^1\text{H}$  COSY NMR spectrum (400 MHz,  $\text{CDCl}_3$ - $\text{CD}_3\text{COCD}_3 = 2/1$ , v/v, 298 K, 15mM) of AB2+C2+TP4.

## 2. Concentration-dependent $^1\text{H}$ NMR spectra

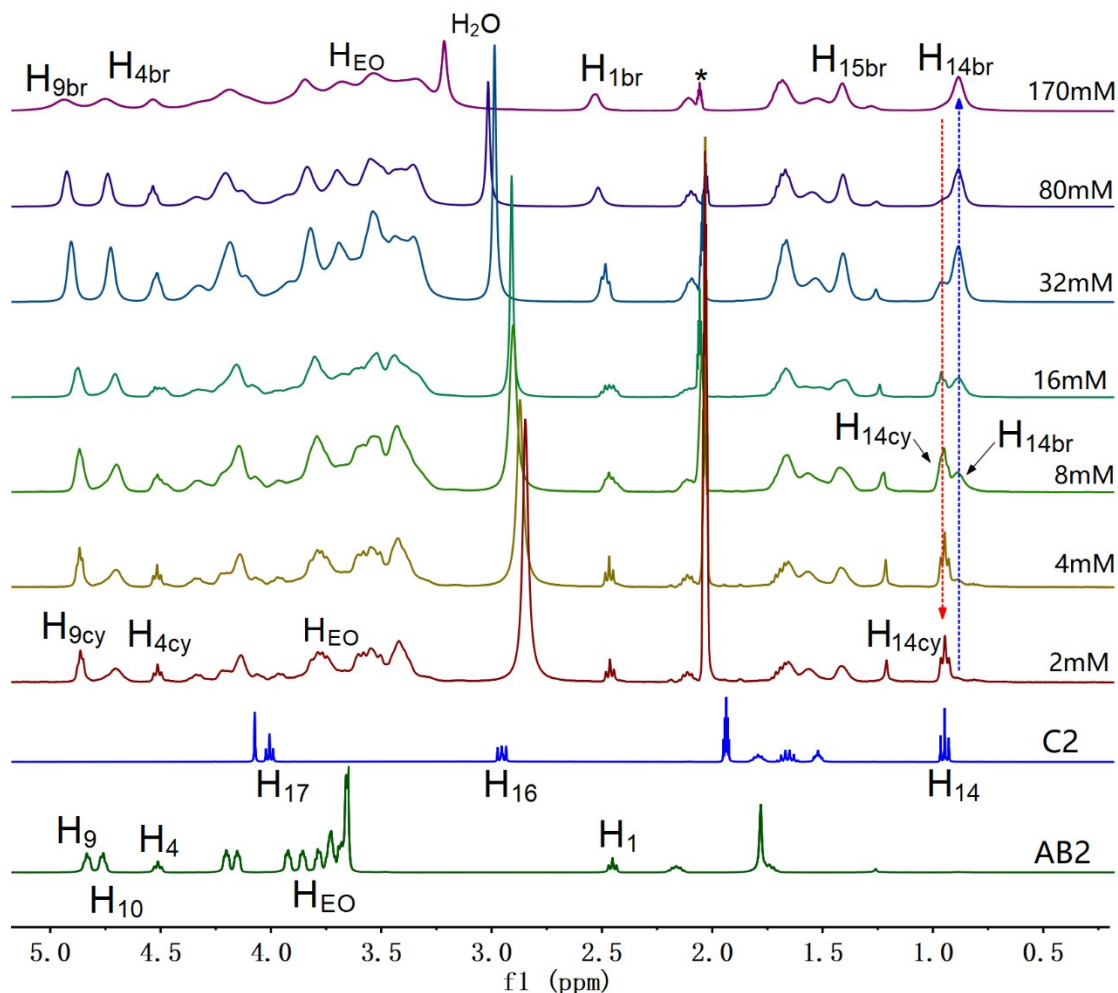

**Fig. S3**  $^1\text{H}$  NMR spectra (400 MHz,  $\text{CDCl}_3$ - $\text{CD}_3\text{COCD}_3 = 2/1$ , v/v, 298 K) of (a) individual AB2, (b) individual C2; AB2+C2 (molar ratio: AB2:C2=1:1) at different concentrations (c) 2 mM, (d) 4 mM, (e) 8 mM, (f) 16 mM, (g) 32 mM, (h) 80 mM, (i) 170mM. Peaks of cyclic oligomers and the hyperbranched polymers were marked as cy, and br, respectively.

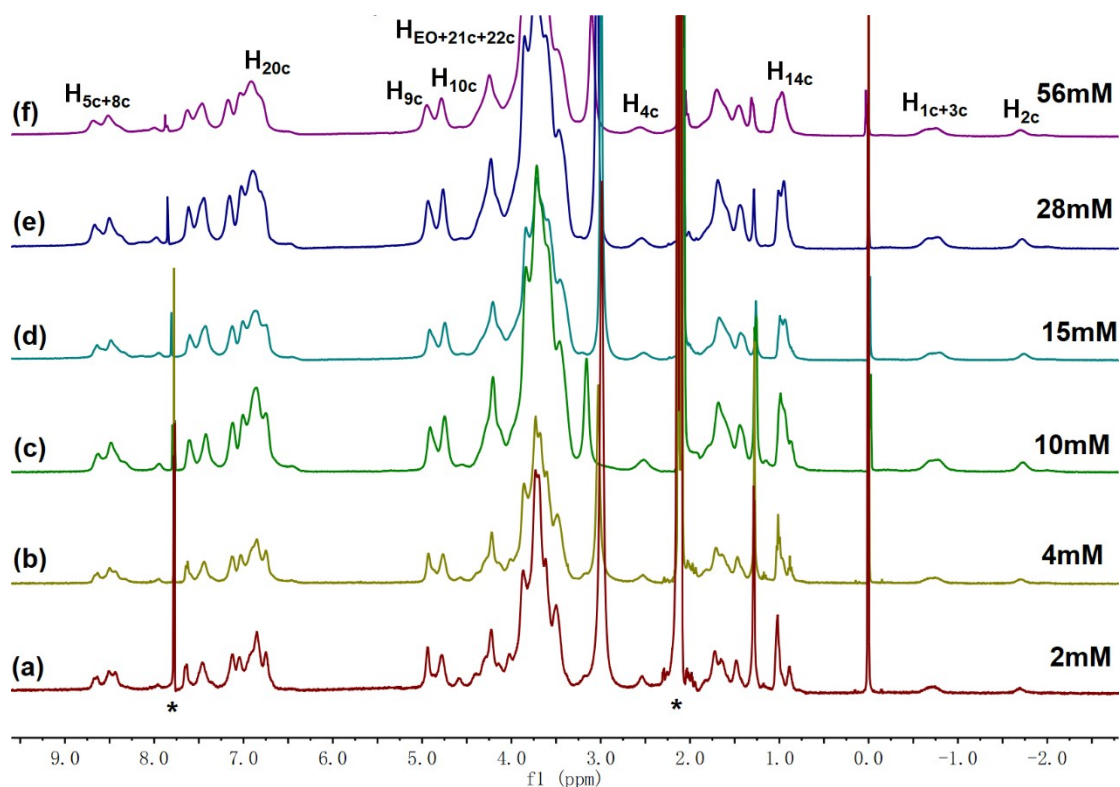

**Fig. S4**  $^1\text{H}$  NMR spectra (400 MHz,  $\text{CDCl}_3\text{-CD}_3\text{COCD}_3 = 2/1$ , v/v, 298 K) of  $\text{AB}_2\text{+C}_2\text{+TP}_4$  (molar ratio:  $\text{AB}_2\text{:C}_2\text{:TP}_4=4\text{:}4\text{:}1$ ) at different concentrations (a) 2 mM, (b) 4 mM, (c) 10 mM, (d) 15 mM, (e) 28 mM, (h) 56 mM. Complexed protons were marked as c.

### 3. 2D NOESY NMR spectra

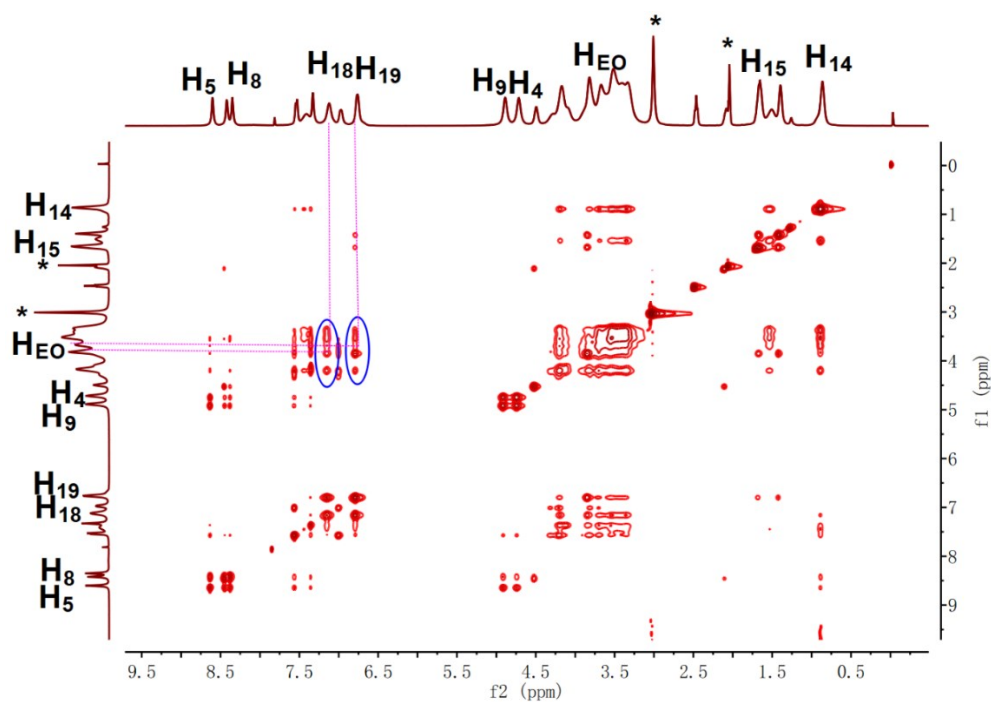

**Fig. S5** NOESY NMR (400 MHz,  $\text{CDCl}_3\text{-CD}_3\text{COCD}_3 = 2/1$ , v/v, 298 K, 70mM) spectrum of  $\text{AB}_2\text{+C}_2$ . The strong correlations between  $\text{H}_{18-19}$  from  $\text{C}_2$  and  $\text{H}_{\text{EO}}$  from  $\text{AB}_2$  indicated that the dialkylammonium group of  $\text{C}_2$  was complexed tightly with the B21C group of  $\text{AB}_2$  in the solution.<sup>[S1]</sup>

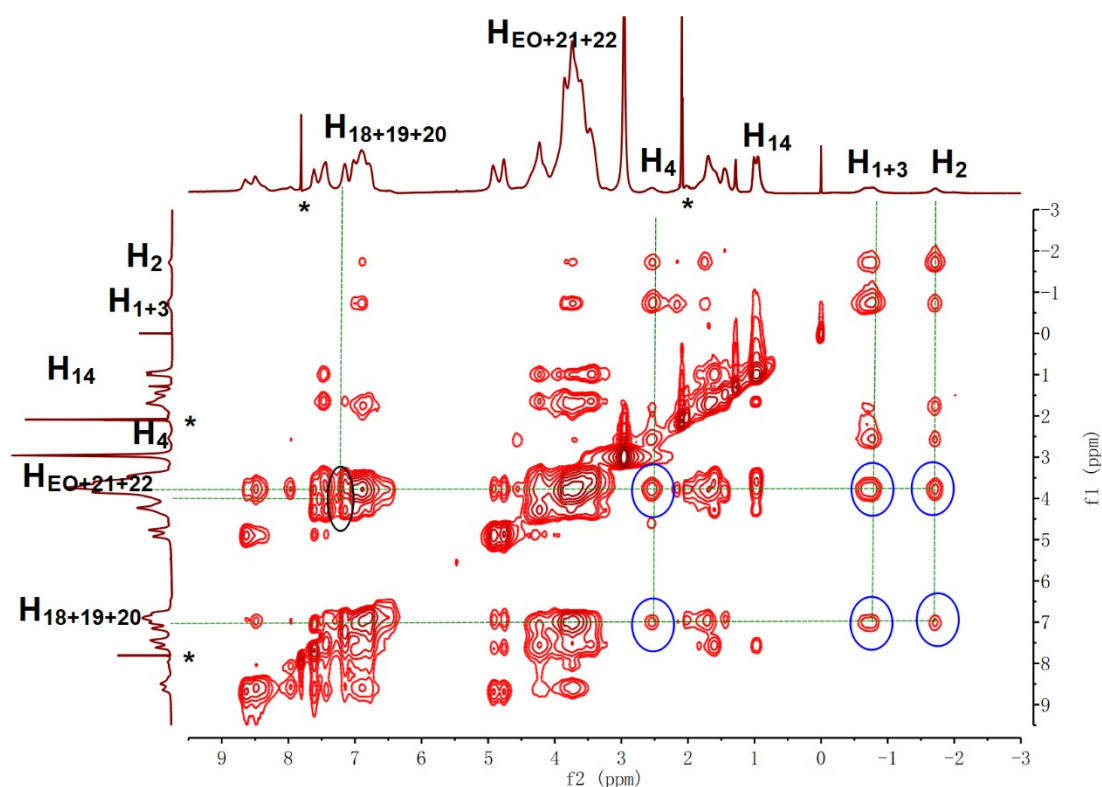

**Fig. S6** NOESY NMR (400 MHz,  $\text{CDCl}_3$ - $\text{CD}_3\text{COCD}_3 = 2/1$ , v/v, 298 K, 25mM) spectrum of AB2+C2+TP4. The strong correlation between  $\text{H}_{18}$  from C2 and  $\text{H}_{\text{EO}}$  from AB2 indicated that the dialkylammonium group of C2 was complexed tightly with the B21C group of AB2 in the solution. In addition, the  $\text{H}_{1-4}$  from AB2 and  $\text{H}_{20}$ - $\text{H}_{22}$  were clearly observed, suggesting that the TAPN threaded into the cavity of P5.<sup>[S2]</sup>

#### 4. 2D DOSY NMR spectra

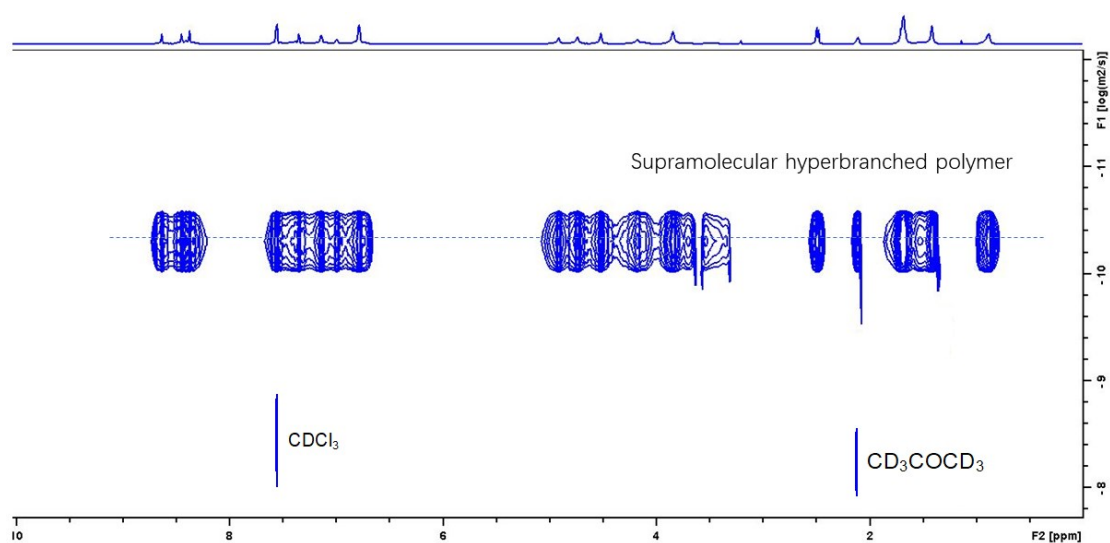

**Fig. S7** Representative DOSY spectrum (500 MHz,  $\text{CDCl}_3$ - $\text{CD}_3\text{COCD}_3 = 2/1$ , v/v, 298 K) of AB2+C2, the AB2 concentration is 140 mM.

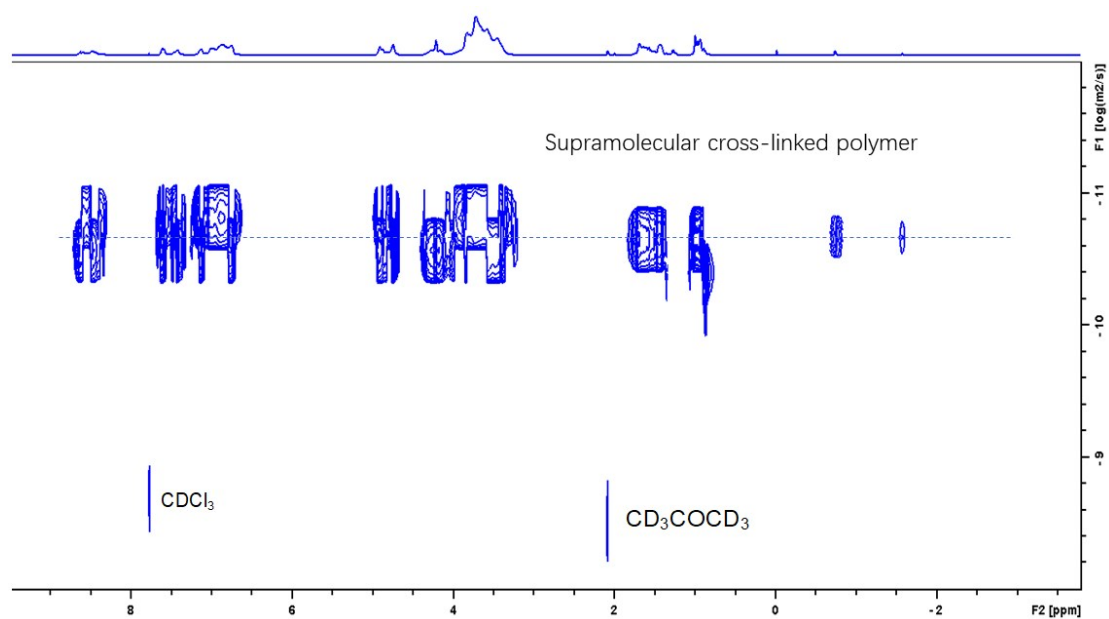

**Fig. S8** Representative DOSY spectrum (500 MHz, CDCl<sub>3</sub>-CD<sub>3</sub>COCD<sub>3</sub> = 2/1, v/v, 298 K) of AB2+C2+TP4, the AB2 concentration is 56 mM.

## 5. TEM photograph

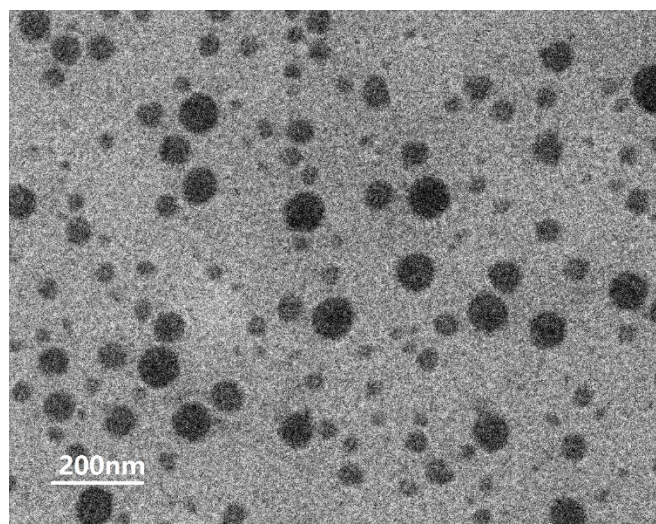

**Fig. S9** Representative TEM image of the supramolecular hyperbranched polymer (SHP1).



## 6. Disassembly and reassembly of supramolecular polymers by adding -removing $K^+$

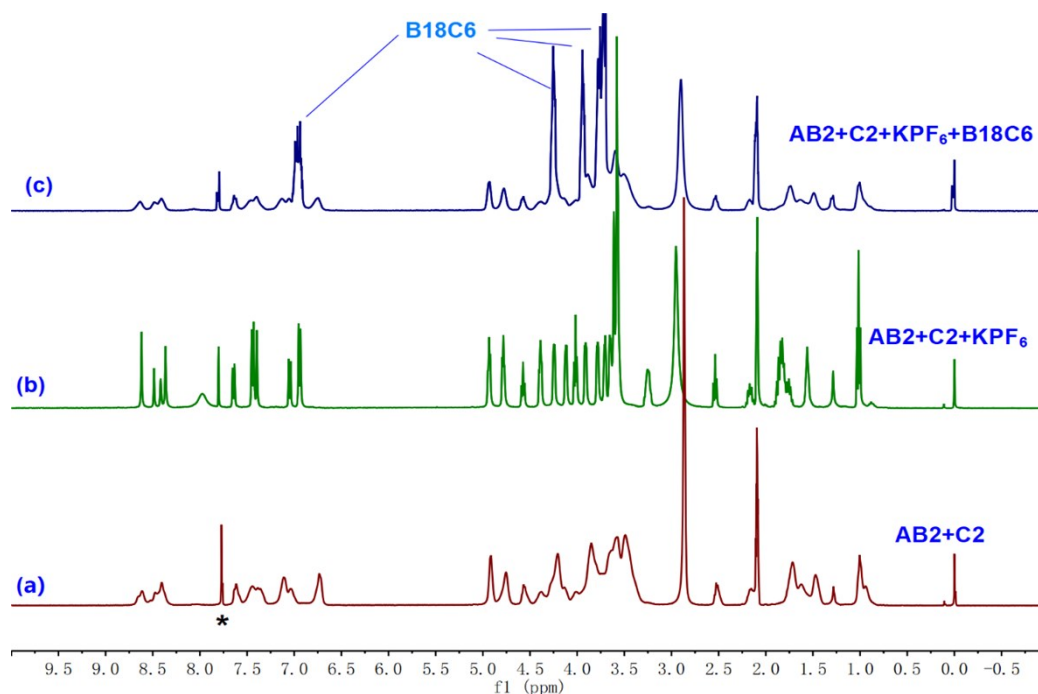

**Fig. S10**  $^1\text{H}$  NMR spectra (400 MHz,  $\text{CDCl}_3$ - $\text{CD}_3\text{COCD}_3$  = 2/1, v/v, 298 K, 20 mM) of (a)  $\text{AB}_2+\text{C}_2$ , (b) after the addition of 2 equiv.  $\text{KPF}_6$ , and (c) after the addition of 2.2 equiv.  $\text{B18C6}$ .

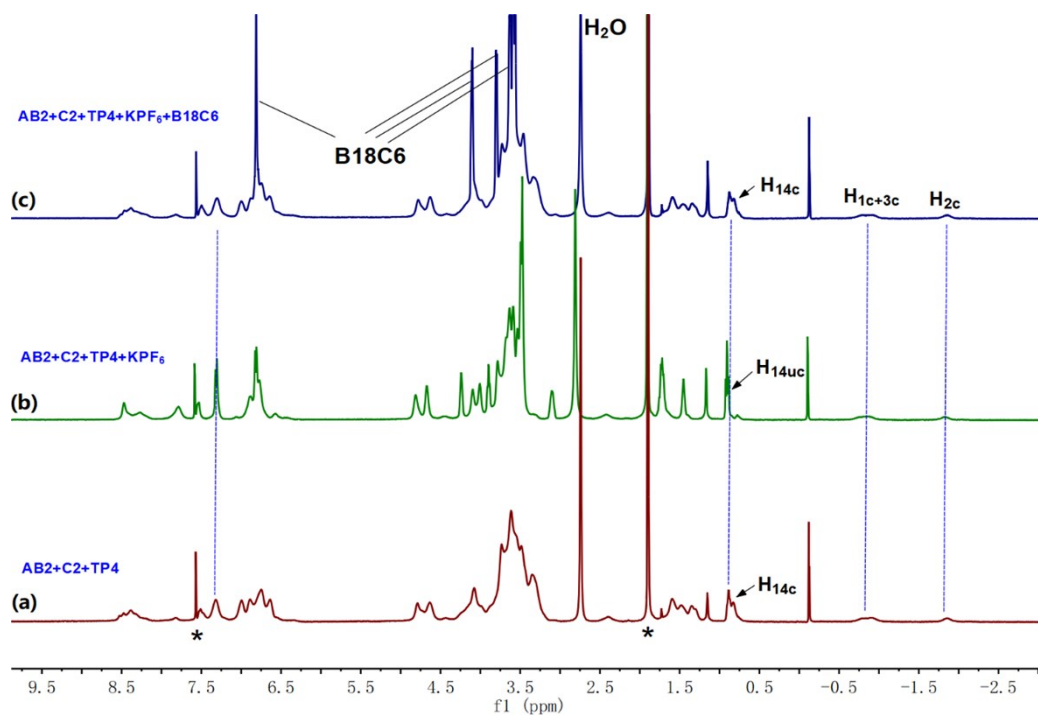

**Fig. S11**  $^1\text{H}$  NMR spectra (400 MHz,  $\text{CDCl}_3$ - $\text{CD}_3\text{COCD}_3$  = 2/1, v/v, 298 K, 20 mM) of (a)  $\text{AB}_2+\text{C}_2+\text{TP}_4$ , (b) after the addition of 2 equiv.  $\text{KPF}_6$ , and (c) after the addition of 2.2 equiv.  $\text{B18C6}$ .

## 7. Disassembly of SCP1 by adding adiponitrile

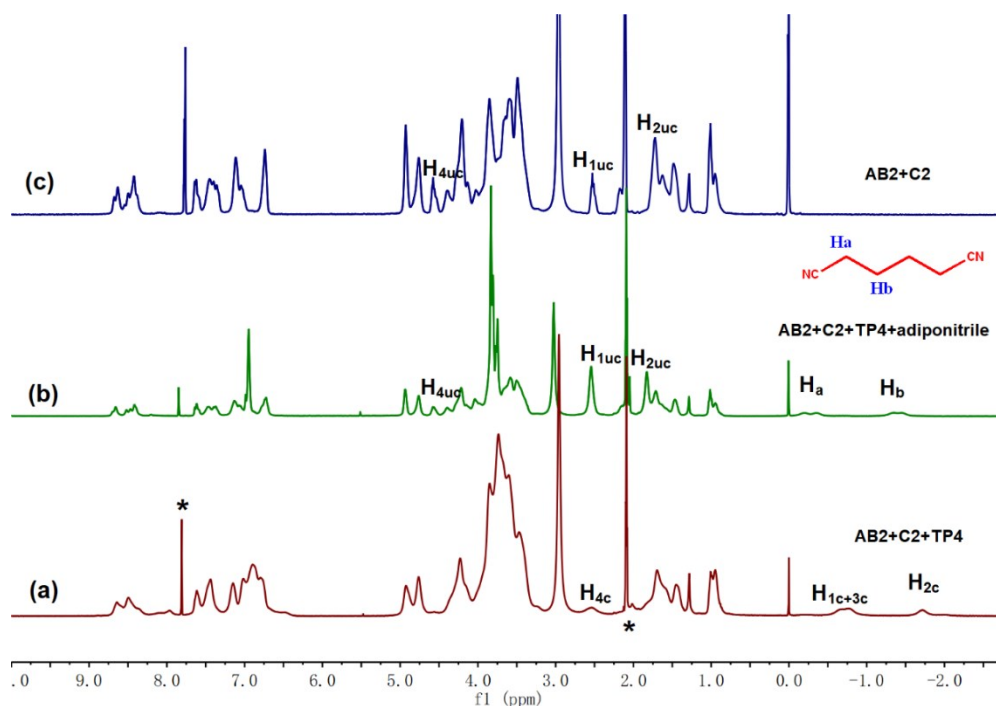

**Fig. S12**  $^1\text{H}$  NMR spectra (400 MHz, 298 K,  $\text{CDCl}_3\text{-CD}_3\text{COCD}_3$ , 20 mM) of (a) AB2+C2+TP4, (b) after the addition of 1.1 equiv. adiponitrile to the solution of AB2+C2+TP4, (c) AB2+C2.

## 8. Fluorescence titrations

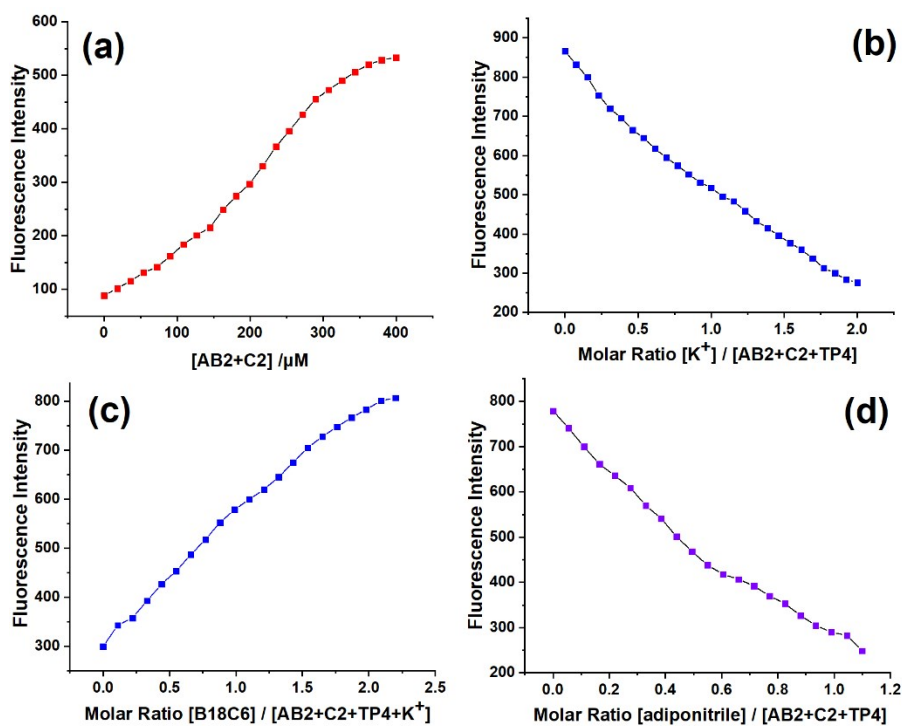

**Fig. S13** (a) fluorescence intensity changes versus the concentrations of AB2+C2. (b) fluorescence intensity changes



versus molar ratios of  $[K^+]/[AB2+C2+TP4]$ . (c) fluorescence intensity changes versus molar ratios of  $[B18C6]/[AB2+C2+TP4+K^+]$ . (d) fluorescence intensity changes versus molar ratios of  $[adiponitrile]/[AB2+C2+TP4]$ .

## 9. Synthesis of Monomers

### The synthesis of monomer AB2

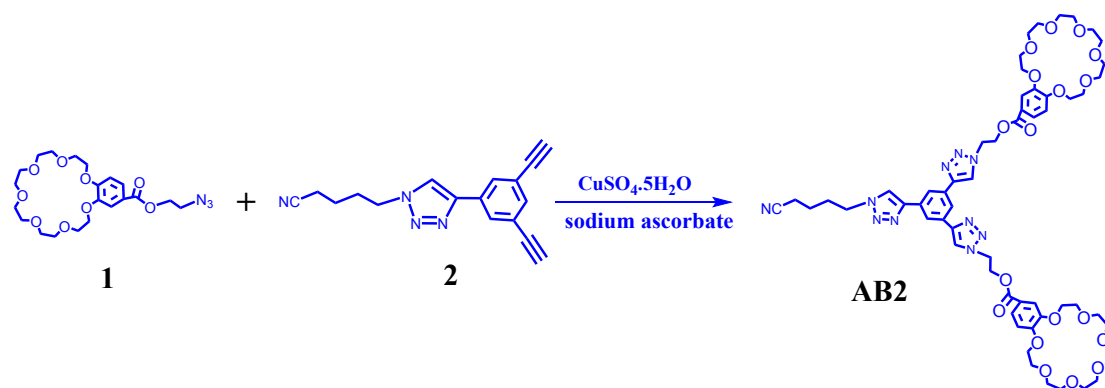

**Scheme S1** Synthetic route of monomer AB2.

Compounds 1 (3.00g, 6.45mmol) and 2 (0.71g, 2.91mmol) were added into a solution of tetrahydrofuran and water (5:1, 150 mL) in the presence of  $CuSO_4 \cdot 5H_2O$  (144mg, 0.57 mmol) with sodium ascorbate (273.6 mg, 1.43 mmol), the mixture was stirred at 70 °C for 14h. After the reaction mixture was cooled to ambient temperature, the solvent was evaporated under reduced pressure. The resultant residue was dissolved in  $CH_2Cl_2$  (100 mL) and washed twice with water (100 mL). The organic phase was combined and dried over anhydrous  $Na_2SO_4$ , the solvent was evaporated to afford the crude product and the crude product was subjected to column chromatography ( $CH_2Cl_2/CH_3OH=50:1$ ), to give AB2 (2.18g, 40 %) as a white solid.  $^1H$  NMR (400 MHz,  $CDCl_3$ , 298 K): ppm = 8.32 (s, 2H), 8.28 (s, 1H), 8.09 (s, 2H), 7.99 (s, 1H), 7.62 (d,  $J=8.4$  Hz, 1H), 7.49 (s, 1H), 6.92 (d,  $J=8.4$  Hz, 1H), 4.85-4.87(m, 4H), 4.77-4.79(m, 4H), 4.52 (t,  $J=6.8$  Hz, 2H), 4.19-4.23 (m, 4H), 4.13-4.18 (m, 4H), 3.90-3.94 (m, 4H), 3.82-3.87 (m, 4H), 3.78-3.81 (m, 4H), 3.71-3.76 (m, 8H), 3.64-3.69 (m, 20H), 2.46 (t,  $J=6.8$  Hz, 2H), 2.15-2.19 (m, 2H), 1.72-1.77 (m, 2H),  $^{13}C$  NMR (100 MHz,  $CDCl_3$ ):  $\delta$  (ppm) = 165.9, 153.7, 148.6, 147.4, 131.9, 124.9, 122.7, 122.1, 121.4, 120.7, 119.2, 114.8, 112.7, 71.5, 71.4, 71.3, 71.2, 71.1, 70.7, 69.8, 69.7, 69.6, 69.4, 62.9, 49.8, 49.6, 29.3, 22.6, 16.9. HR-ESI-MS ( $C_{59}H_{76}N_{10}O_{18}$ ):  $m/z$  calcd for  $[M+Na]^+$  = 1235.5231, found = 1235.5216, error 1.2 ppm.

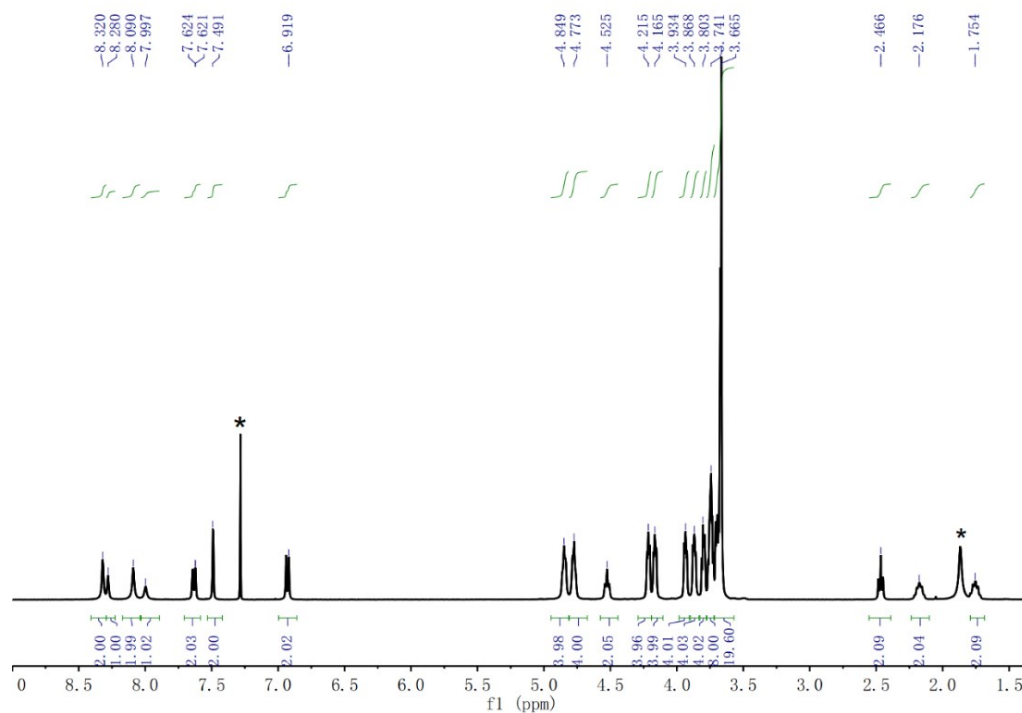

**Fig. S14** <sup>1</sup>H NMR spectrum (400 MHz, CDCl<sub>3</sub>, room temperature) of compound AB2.

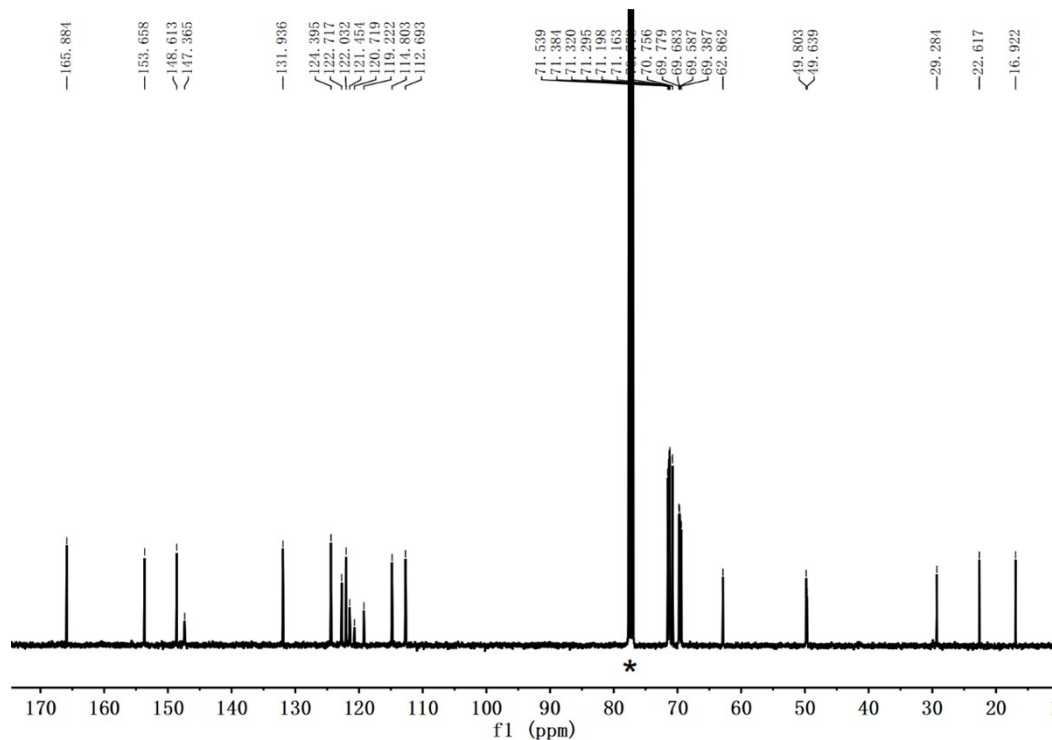

**Fig. S15** <sup>13</sup>C NMR spectrum (100 MHz, CDCl<sub>3</sub>, room temperature) of compound AB2.

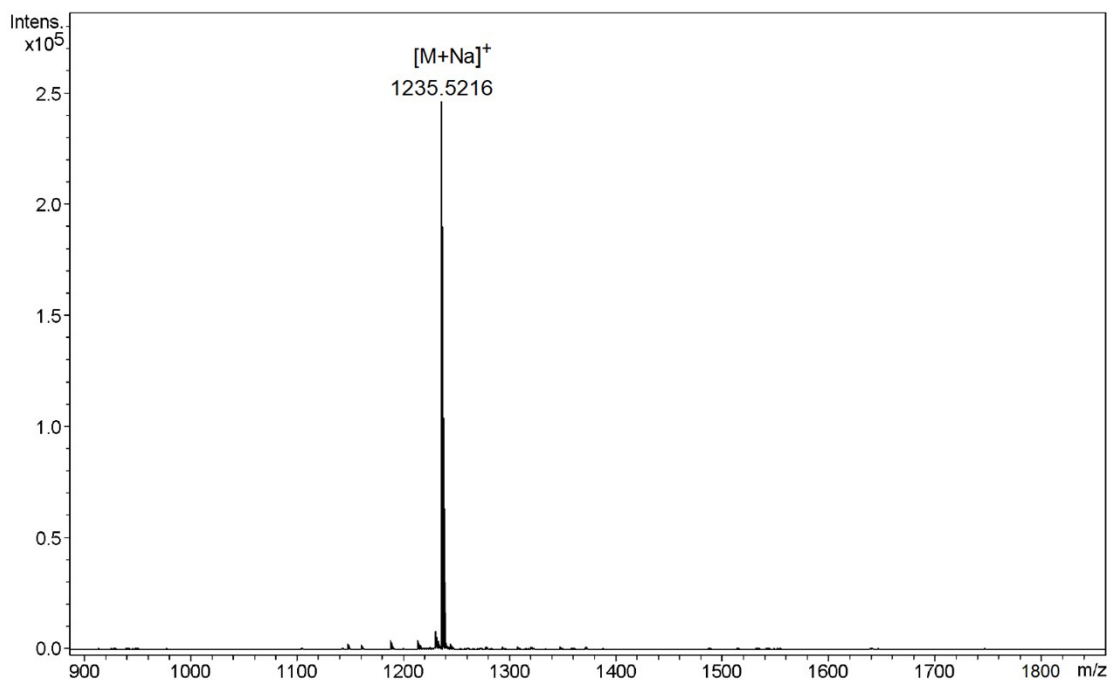

**Fig. S16** Electrospray ionization mass spectrum of compound AB2.

### The synthesis of monomer TP4

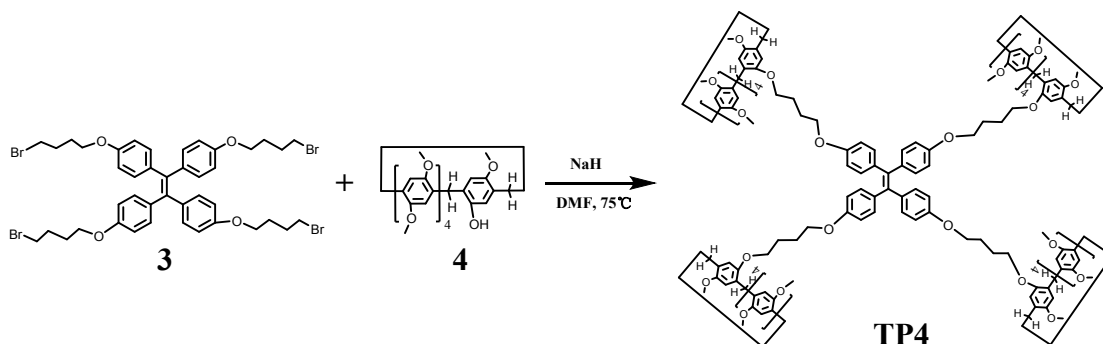

**Scheme S2** Synthetic route of monomer TP4.

Compound TP4 was synthesized by reference to the literature procedure.<sup>[S3]</sup> A mixture of compound 3 (1.0 g, 1.1 mmol), 4 (3.1g, 4.2mmol), NaH (0.21 g, 9.0 mmol), and DMF (50ml) were added to a 150 mL flask under N<sub>2</sub>. After the mixture was stirred at 75 °C for 14 h, the reaction mixture was cooled and poured into saturated brine (100 mL) and the resulting solution was extracted with dichloromethane (50 mL×3). The organic phase was dried over anhydrous Na<sub>2</sub>SO<sub>4</sub> and evaporated to afford the crude product, which was purified by flash column chromatography (dichloromethane /ethyl acetate, 100:1, v/v) to give TP4 (1.68g, 46%) as a white solid. <sup>1</sup>H NMR (400 MHz, CDCl<sub>3</sub>,

298 K): ppm = 6.98 (d,  $J = 8.8$  Hz, 8H), 6.72-6.81 (m, 40H), 6.66 (d,  $J = 8.8$  Hz, 8H), 3.93-3.98 (m, 8H), 3.83-3.91 (m, 8H), 3.73-3.82 (m, 40H), 3.60-3.70 (m, 108H), 1.92-1.97 (m, 16H).

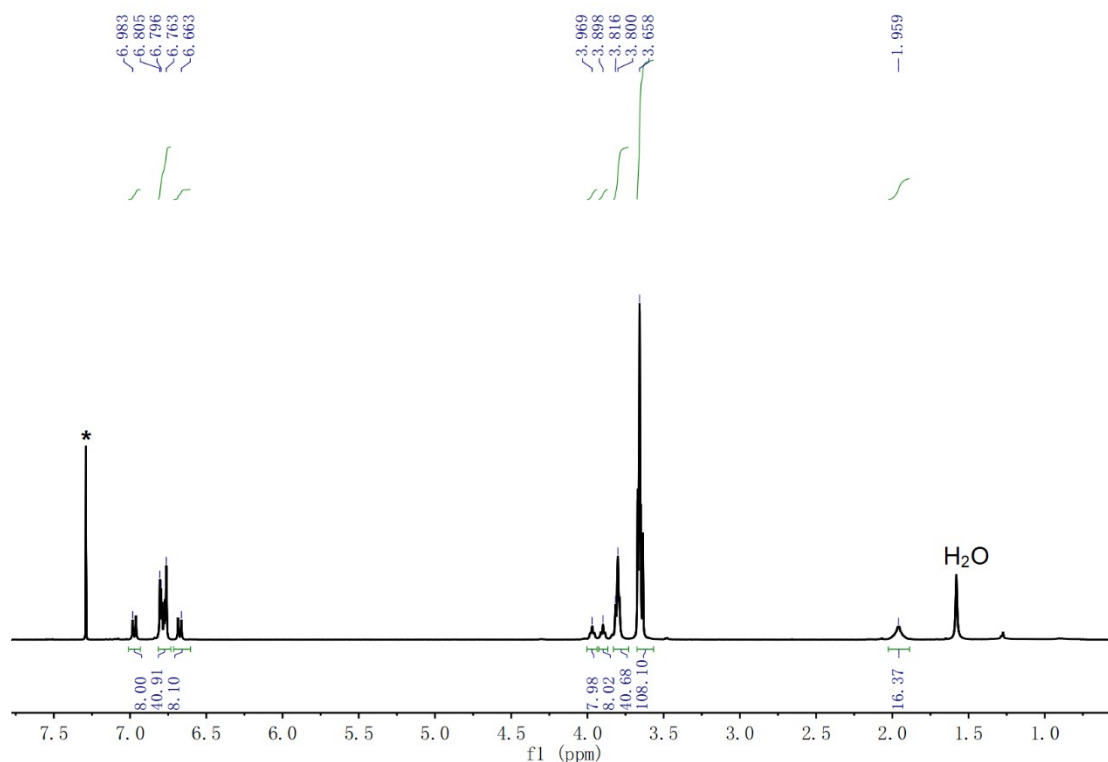

Fig. S17  $^1\text{H}$  NMR spectrum (400 MHz,  $\text{CDCl}_3$ , room temperature) of compound TP4.

## The synthesis of monomer C2

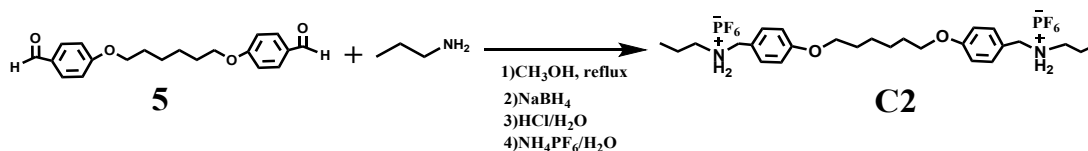

Scheme S3 Synthetic route of monomer C2.

The synthetic method of C2 has been reported elsewhere.<sup>[S4]</sup> Bisaldehyde 5 (1.21g, 3.7mmol) and propylamine (0.44g, 7.4mmol) were dissolved in ethanol (40 mL) and was stirred at 75 °C under  $\text{N}_2$  atmosphere overnight. After the reaction mixture was cooled to ambient temperature,  $\text{NaBH}_4$  (0.28 g, 7.5mmol) was added to the solution in small portion and the mixture was stirred at room temperature for another 8 h. Water (50 mL) and 2 M HCl were added to quench the remaining  $\text{NaBH}_4$  and acidify the amine. The solvent was removed under reduced pressure to give a white solid which was suspended in acetone (40 mL). Saturated aqueous  $\text{NH}_4\text{PF}_6$  solution was added until the suspension become clear. The resulting solution was evaporated under reduced pressure. The residue was washed with copious amount of water and filtrated to afford the product (1.30 g, 50%).  $^1\text{H}$  NMR (400 MHz,  $\text{CD}_3\text{CN}$ , 298 K): ppm = 7.73 (br, 4H), 7.35 (d,  $J = 8.8$  Hz, 4H), 6.96 (d,  $J = 8.8$  Hz, 4H), 4.07 (s, 4H), 4.01 (t,  $J = 6.4$  Hz, 4H), 2.93 (t,  $J = 7.8$  Hz, 4H), 1.75-1.82 (m, 4H), 1.62-1.69 (m, 4H), 1.50-1.57 (m, 4H), 0.95 (t,  $J = 7.4$  Hz, 6H).

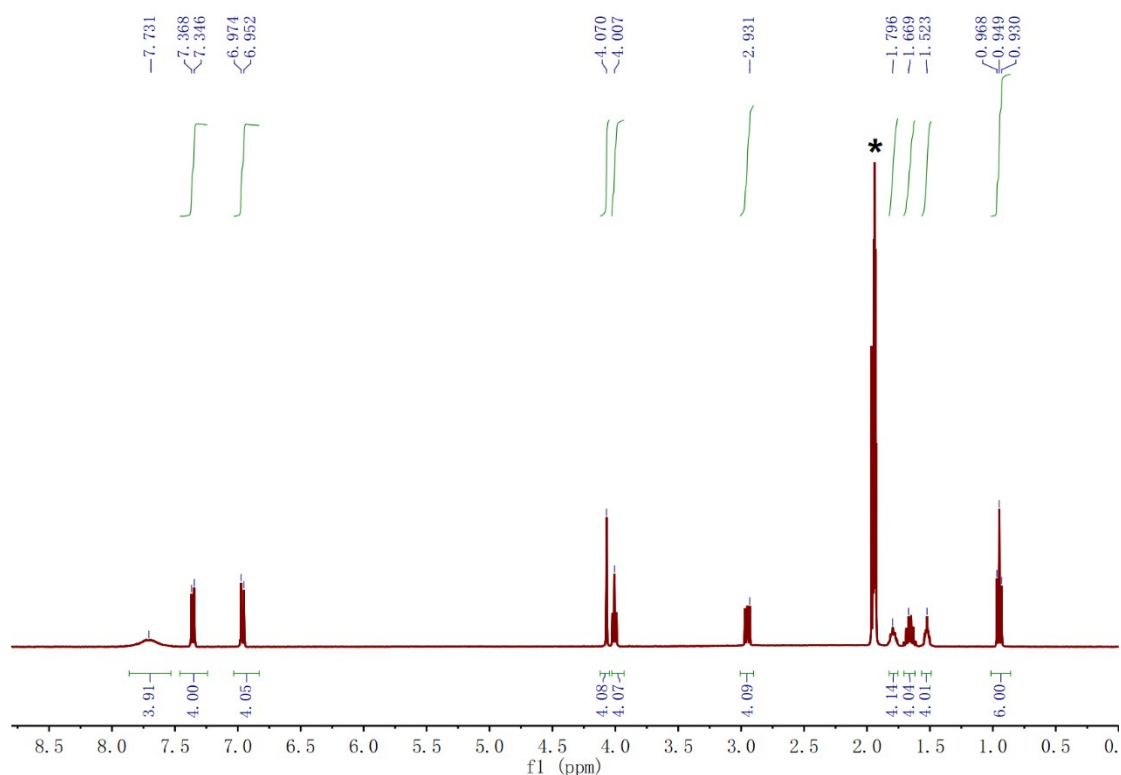

**Fig. S18**  $^1\text{H}$  NMR spectrum (400 MHz,  $\text{CD}_3\text{CN}$ , room temperature) of C2.

## References

- S1.** C. J. Zhang, S. J. Li, J. Q. Zhang, K. L. Zhu, N. Li, F. H. Huang, *Org. Lett.* 2007, **9**, 5553-5556.
- S2.** C. J. Li, K. Han, J. Li, Y. Y. Zhang, W. Chen, Y. H. Yu, X. S. Jia. *Chem. - Eur. J.*, 2013, **19**, 11892-11897.
- S3.** H. Li, Z. Z. Duan, Y. Yang, F. F. Xu, M. F. Chen, T. X. Liang, Y. Bai and R. Q. Li. *Macromolecules*, 2020, **53**, 4255-4263.
- S4.** Y. Yang, H. Li, J. M. Chen, F. F. Xu, Z. Z. Duan, T. X. Liang, Y. Liu and W. Tian. *Polym. Chem.*, 2019, **10**, 6535-6539.
